# Supplementary material for: Uncovering the Effect and Mechanism of Rhizoma Corydalis on Myocardial Infarction Through an Integrated Network Pharmacology Approach and Experimental Verification
Source: Frontiers journal article supplement (doi:10.3389/fphar.2022.927488), 2022-07-22
Supplement: Data_Sheet_1.pdf [file Data_Sheet_1.pdf]

Table S1. Bioactive ingredients of RC.

| ID | Molecule Name        | MW     | Molecular Formula                                            | pubchem CID |
|----|----------------------|--------|--------------------------------------------------------------|-------------|
| 1  | Berberine            | 336.39 | C <sub>20</sub> H <sub>18</sub> NO <sub>4</sub> <sup>+</sup> | 2353        |
| 2  | Coptisine            | 320.34 | C <sub>19</sub> H <sub>14</sub> NO <sub>4</sub> <sup>+</sup> | 72322       |
| 3  | Cryptopin            | 369.45 | C <sub>21</sub> H <sub>23</sub> NO <sub>5</sub>              | 72616       |
| 4  | Dihydrochelerythrine | 349.41 | C <sub>21</sub> H <sub>19</sub> NO <sub>4</sub>              | 485077      |
| 5  | Dihydrosanguinarine  | 333.36 | C <sub>20</sub> H <sub>15</sub> NO <sub>4</sub>              | 124069      |
| 6  | Sanguinarine         | 332.35 | C <sub>20</sub> H <sub>14</sub> NO <sub>4</sub> <sup>+</sup> | 5154        |
| 7  | (S)-Scoulerine       | 327.41 | C <sub>19</sub> H <sub>21</sub> NO <sub>4</sub>              | 439654      |
| 8  | Cavidine             | 353.45 | C <sub>21</sub> H <sub>23</sub> NO <sub>4</sub>              | 193148      |
| 9  | (R)-Canadine         | 339.42 | C <sub>20</sub> H <sub>21</sub> NO <sub>4</sub>              | 443422      |
| 10 | Sitosterol           | 414.79 | C <sub>29</sub> H <sub>50</sub> O                            | 12303645    |
| 11 | Tetrahydropalmatine  | 355.47 | C <sub>21</sub> H <sub>25</sub> NO <sub>4</sub>              | 72301       |
| 12 | Capaurine            | 371.47 | C <sub>21</sub> H <sub>25</sub> NO <sub>5</sub>              | 94149       |
| 13 | Clarkeanidine        | 327.41 | C <sub>19</sub> H <sub>21</sub> NO <sub>4</sub>              | 127376      |
| 14 | Corydaline           | 369.5  | C <sub>22</sub> H <sub>27</sub> NO <sub>4</sub>              | 101301      |

|    |                                                                                                                        |        |                                                              |          |
|----|------------------------------------------------------------------------------------------------------------------------|--------|--------------------------------------------------------------|----------|
| 15 | Corydalmine                                                                                                            | 340.45 | C <sub>20</sub> H <sub>23</sub> NO <sub>4</sub>              | 161665   |
| 16 | Corydine                                                                                                               | 341.44 | C <sub>20</sub> H <sub>23</sub> NO <sub>4</sub>              | 10153    |
| 17 | Corynoline                                                                                                             | 367.43 | C <sub>21</sub> H <sub>21</sub> NO <sub>5</sub>              | 177014   |
| 18 | Corynoloxine                                                                                                           | 365.41 | C <sub>21</sub> H <sub>19</sub> NO <sub>5</sub>              | 1.01E+08 |
| 19 | Methyl-[2-(3,4,6,7-tetramethoxy-1-phenanthryl)ethyl]amine                                                              | 355.47 | C <sub>21</sub> H <sub>25</sub> NO <sub>4</sub>              | 11462401 |
| 20 | Dehydrocavidine                                                                                                        | 351.43 | C <sub>21</sub> H <sub>21</sub> NO <sub>4</sub>              | 92043552 |
| 21 | Dehydrocorybulbine                                                                                                     | 352.44 | C <sub>21</sub> H <sub>22</sub> NO <sub>4</sub> <sup>+</sup> | 5316439  |
| 22 | Dehydrocorydaline                                                                                                      | 366.47 | C <sub>22</sub> H <sub>24</sub> NO <sub>4</sub> <sup>+</sup> | 34781    |
| 23 | Dehydrocorydalmine                                                                                                     | 338.41 | C <sub>20</sub> H <sub>20</sub> NO <sub>4</sub> <sup>+</sup> | 3083983  |
| 24 | 13-Methyldehydrocorydalmine                                                                                            | 352.44 | C <sub>21</sub> H <sub>22</sub> NO <sub>4</sub> <sup>+</sup> | 25254728 |
| 25 | (1S,8'R)-6,7-dimethoxy-2-methylspiro[3,4-dihydroisoquinoline-1,7'-6,8-dihydrocyclopenta[<br>g][1,3]benzodioxole]-8'-ol | 369.45 | C <sub>21</sub> H <sub>23</sub> NO <sub>5</sub>              | 21770852 |
| 26 | Isoboldine                                                                                                             | 327.41 | C <sub>19</sub> H <sub>21</sub> NO <sub>4</sub>              | 133323   |
| 27 | 13-Methylpalmatrubine                                                                                                  | 352.44 | C <sub>21</sub> H <sub>22</sub> NO <sub>4</sub> <sup>+</sup> | 12275616 |
| 28 | N-methyl-laurotetanine                                                                                                 | 341.44 | C <sub>20</sub> H <sub>23</sub> NO <sub>4</sub>              | 6543699  |
| 29 | Norglaucin                                                                                                             | 341.44 | C <sub>20</sub> H <sub>23</sub> NO <sub>4</sub>              | 30835    |
| 30 | Pontevedrine                                                                                                           | 381.41 | C <sub>21</sub> H <sub>19</sub> NO <sub>6</sub>              | 11047165 |

|    |                                                                                 |         |                                                              |          |
|----|---------------------------------------------------------------------------------|---------|--------------------------------------------------------------|----------|
| 31 | Pseudocoptisine                                                                 | 320.34  | C <sub>19</sub> H <sub>14</sub> NO <sub>4</sub> <sup>+</sup> | 15520811 |
| 32 | Pseudoprotopine                                                                 | 353.4   | C <sub>20</sub> H <sub>19</sub> NO <sub>5</sub>              | 185559   |
| 33 | Saulatine                                                                       | 396.47  | C <sub>22</sub> H <sub>23</sub> NO <sub>6</sub>              | 185141   |
| 34 | l-Tetrahydrocoptisine                                                           | 323.37  | C <sub>19</sub> H <sub>17</sub> NO <sub>4</sub>              | 697545   |
| 35 | Tetrahydrocorysamine                                                            | 337.4   | C <sub>20</sub> H <sub>19</sub> NO <sub>4</sub>              | 14315597 |
| 36 | Tetrahydroprotopapaverine                                                       | 329.43  | C <sub>19</sub> H <sub>23</sub> NO <sub>4</sub>              | 40512630 |
| 37 | (+)-Thaliporphine                                                               | 341.44  | C <sub>20</sub> H <sub>23</sub> NO <sub>4</sub>              | 6992288  |
| 38 | 2,3,9,10-Tetramethoxy-13-methyl-5,6-dihydroisoquinolino[2,1-b]isoquinolin-8-one | 381.46  | C <sub>22</sub> H <sub>23</sub> NO <sub>5</sub>              | 10362429 |
| 39 | Stigmasterol                                                                    | 412.77  | C <sub>29</sub> H <sub>48</sub> O                            | 5280794  |
| 40 | Palmatine                                                                       | 352.44  | C <sub>21</sub> H <sub>22</sub> NO <sub>4</sub> <sup>+</sup> | 19009    |
| 41 | Fumarine                                                                        | 353.4   | C <sub>20</sub> H <sub>19</sub> NO <sub>5</sub>              | 4970     |
| 42 | Isocorypalmine                                                                  | 341.44  | C <sub>20</sub> H <sub>23</sub> NO <sub>4</sub>              | 440229   |
| 43 | Bicuculline                                                                     | 367.38  | C <sub>20</sub> H <sub>17</sub> NO <sub>6</sub>              | 10237    |
| 44 | Bulbocapnine                                                                    | 325.39  | C <sub>19</sub> H <sub>19</sub> NO <sub>4</sub>              | 12441    |
| 45 | Quercetin                                                                       | 302.25  | C <sub>15</sub> H <sub>10</sub> O <sub>7</sub>               | 5280343  |
| 46 | Fumaric Acid                                                                    | 116.072 | C <sub>4</sub> H <sub>4</sub> O <sub>4</sub>                 | 444972   |
|    |                                                                                 | 2       |                                                              |          |

|    |                       |              |                                                              |          |
|----|-----------------------|--------------|--------------------------------------------------------------|----------|
| 47 | Allocryptopine        | 369.411      | C <sub>21</sub> H <sub>23</sub> NO <sub>5</sub>              | 98570    |
| 48 | Columbamine           | 338.377<br>1 | C <sub>20</sub> H <sub>20</sub> NO <sub>4</sub> <sup>+</sup> | 72310    |
| 49 | (S)-Canadine          | 339.385      | C <sub>20</sub> H <sub>21</sub> NO <sub>4</sub>              | 21171    |
| 50 | Corybulbine           | 355.427<br>5 | C <sub>21</sub> H <sub>25</sub> NO <sub>4</sub>              | 10316181 |
| 51 | Corypalmine           | 341.400<br>9 | C <sub>20</sub> H <sub>23</sub> NO <sub>4</sub>              | 11186895 |
| 52 | Glaucine              | 355.427<br>5 | C <sub>21</sub> H <sub>25</sub> NO <sub>4</sub>              | 16754    |
| 53 | Isocorydine           | 341.400<br>9 | C <sub>20</sub> H <sub>23</sub> NO <sub>4</sub>              | 10143    |
| 54 | (+)-Isocorypalmine    | 341.400<br>9 | C <sub>20</sub> H <sub>23</sub> NO <sub>4</sub>              | 71261649 |
| 55 | Leonticine            | 327.417<br>4 | C <sub>20</sub> H <sub>25</sub> NO <sub>3</sub>              | 12314123 |
| 56 | N-Methyllaurotetanine | 341.400      | C <sub>20</sub> H <sub>23</sub> NO <sub>4</sub>              | 16573    |

|    |                |              |                                                 |          |
|----|----------------|--------------|-------------------------------------------------|----------|
|    |                | 9            |                                                 |          |
| 57 | Norisocorydine | 327.374<br>3 | C <sub>19</sub> H <sub>21</sub> NO <sub>4</sub> | 12313549 |
| 58 | (S)-Stylopine  | 323.342<br>6 | C <sub>19</sub> H <sub>17</sub> NO <sub>4</sub> | 440583   |
| 59 | Yuanhunine     | 355.427<br>5 | C <sub>21</sub> H <sub>25</sub> NO <sub>4</sub> | 128558   |
| 60 | d-Corydalin    | 369.5        | C <sub>22</sub> H <sub>27</sub> NO <sub>4</sub> | 326549   |

Table S2. Information of 126 core targets.

| Gene name | Description                                                       |
|-----------|-------------------------------------------------------------------|
| CDK2      | cyclin dependent kinase 2                                         |
| CUL5      | cullin 5                                                          |
| RPA1      | replication protein A1                                            |
| ILF2      | interleukin enhancer binding factor 2                             |
| RPA3      | replication protein A3                                            |
| CAND1     | cullin associated and neddylation dissociated 1                   |
| RPA2      | replication protein A2                                            |
| SYNCRIP   | synaptotagmin binding cytoplasmic RNA interacting protein         |
| ILF3      | interleukin enhancer binding factor 3                             |
| NEDD8     | neural precursor cell expressed, developmentally down-regulated 8 |
| RPS3      | ribosomal protein S3                                              |
| RPS6      | ribosomal protein S6                                              |
| COPS5     | COP9 signalosome subunit 5                                        |
| RPS4X     | ribosomal protein S4, X-linked                                    |
| MYH9      | myosin heavy chain 9                                              |
| TARDBP    | TAR DNA binding protein                                           |
| HSPA1A    | heat shock protein family A (Hsp70) member 1A                     |
| SF3B1     | splicing factor 3b subunit 1                                      |
| HSPA1B    | heat shock protein family A (Hsp70) member 1B                     |
| KAT5      | lysine acetyltransferase 5                                        |
| MYC       | v-myc avian myelocytomatosis viral oncogene homolog               |
| PRKDC     | protein kinase, DNA-activated, catalytic polypeptide              |
| CEP250    | centrosomal protein 250                                           |
| HSP90AA1  | heat shock protein 90 alpha family class A member 1               |
| HSP90AB1  | heat shock protein 90 alpha family class B member 1               |
| HSPA5     | heat shock protein family A (Hsp70) member 5                      |
| CLTC      | clathrin heavy chain                                              |

|          |                                                                    |
|----------|--------------------------------------------------------------------|
| HSPA4    | heat shock protein family A (Hsp70) member 4                       |
| HSPA9    | heat shock protein family A (Hsp70) member 9                       |
| RPS27A   | ribosomal protein S27a                                             |
| HSPA8    | heat shock protein family A (Hsp70) member 8                       |
| PARP1    | poly(ADP-ribose) polymerase 1                                      |
| NPM1     | nucleophosmin                                                      |
| FLNA     | filamin A                                                          |
| UBL4A    | ubiquitin like 4A                                                  |
| HIST1H4I | histone cluster 1 H4 family member i                               |
| HNRNPM   | heterogeneous nuclear ribonucleoprotein M                          |
| NTRK1    | neurotrophic receptor tyrosine kinase 1                            |
| EED      | embryonic ectoderm development                                     |
| NCL      | nucleolin                                                          |
| FN1      | fibronectin 1                                                      |
| TUBG1    | tubulin gamma 1                                                    |
| ACTB     | actin beta                                                         |
| H2AFX    | H2A histone family member X                                        |
| HUWE1    | HECT, UBA and WWE domain containing 1, E3 ubiquitin protein ligase |
| UBE2I    | ubiquitin conjugating enzyme E2 I                                  |
| EGFR     | epidermal growth factor receptor                                   |
| FBXO6    | F-box protein 6                                                    |
| MAP3K1   | mitogen-activated protein kinase kinase kinase 1                   |
| AKT1     | AKT serine/threonine kinase 1                                      |
| GRB2     | growth factor receptor bound protein 2                             |
| MDM2     | MDM2 proto-oncogene                                                |
| CUL7     | cullin 7                                                           |
| HDAC1    | histone deacetylase 1                                              |
| MCM5     | minichromosome maintenance complex component 5                     |

|          |                                                                                |
|----------|--------------------------------------------------------------------------------|
| MCM2     | minichromosome maintenance complex component 2                                 |
| HDAC2    | histone deacetylase 2                                                          |
| AR       | androgen receptor                                                              |
| CCDC8    | coiled-coil domain containing 8                                                |
| CREBBP   | CREB binding protein                                                           |
| VCP      | valosin containing protein                                                     |
| STAU1    | staufen double-stranded RNA binding protein 1                                  |
| VHL      | von Hippel-Lindau tumor suppressor                                             |
| SNW1     | SNW domain containing 1                                                        |
| EP300    | E1A binding protein p300                                                       |
| SIRT7    | sirtuin 7                                                                      |
| VCAM1    | vascular cell adhesion molecule 1                                              |
| HIST1H3F | histone cluster 1 H3 family member f                                           |
| ARRB2    | arrestin beta 2                                                                |
| UBC      | ubiquitin C                                                                    |
| ITGA4    | integrin subunit alpha 4                                                       |
| PABPC1   | poly(A) binding protein cytoplasmic 1                                          |
| XPO1     | exportin 1                                                                     |
| XRCC5    | X-ray repair cross complementing 5                                             |
| YWHAG    | tyrosine 3-monooxygenase/tryptophan 5-monooxygenase activation protein gamma   |
| YWHAE    | tyrosine 3-monooxygenase/tryptophan 5-monooxygenase activation protein epsilon |
| PAN2     | PAN2 poly(A) specific ribonuclease subunit                                     |
| SUZ12    | SUZ12 polycomb repressive complex 2 subunit                                    |
| U2AF2    | U2 small nuclear RNA auxiliary factor 2                                        |
| EEF1A1   | eukaryotic translation elongation factor 1 alpha 1                             |
| PARK2    | parkin RBR E3 ubiquitin protein ligase                                         |
| HNRNPU   | heterogeneous nuclear ribonucleoprotein U                                      |



|          |                                                                             |
|----------|-----------------------------------------------------------------------------|
| SRRM2    | serine/arginine repetitive matrix 2                                         |
| HIST1H4H | histone cluster 1 H4 family member h                                        |
| CTNNB1   | catenin beta 1                                                              |
| HNRNPK   | heterogeneous nuclear ribonucleoprotein K                                   |
| ESR1     | estrogen receptor 1                                                         |
| HNRNPA1  | heterogeneous nuclear ribonucleoprotein A1                                  |
| YWHAZ    | tyrosine 3-monooxygenase/tryptophan 5-monooxygenase activation protein zeta |
| SMURF1   | SMAD specific E3 ubiquitin protein ligase 1                                 |
| HDAC5    | histone deacetylase 5                                                       |
| EZH2     | enhancer of zeste 2 polycomb repressive complex 2 subunit                   |
| APP      | amyloid beta precursor protein                                              |
| EWSR1    | EWS RNA binding protein 1                                                   |
| RELA     | RELA proto-oncogene, NF-kB subunit                                          |
| FUS      | FUS RNA binding protein                                                     |
| CUL4B    | cullin 4B                                                                   |
| CUL4A    | cullin 4A                                                                   |
| CUL3     | cullin 3                                                                    |
| CUL2     | cullin 2                                                                    |
| TUBB     | tubulin beta class I                                                        |
| CUL1     | cullin 1                                                                    |
| HIST1H3J | histone cluster 1 H3 family member j                                        |
| HIST1H3E | histone cluster 1 H3 family member e                                        |
| HIST1H3B | histone cluster 1 H3 family member b                                        |
| XRCC6    | X-ray repair cross complementing 6                                          |
| HIST1H3H | histone cluster 1 H3 family member h                                        |
| TP53     | tumor protein p53                                                           |
| HIST1H3A | histone cluster 1 H3 family member a                                        |
| HIST1H3D | histone cluster 1 H3 family member d                                        |

|          |                                                                                                   |
|----------|---------------------------------------------------------------------------------------------------|
| RACK1    | receptor for activated C kinase 1                                                                 |
| EIF4A3   | eukaryotic translation initiation factor 4A3                                                      |
| HIST1H3G | histone cluster 1 H3 family member g                                                              |
| BMI1     | BMI1 proto-oncogene, polycomb ring finger                                                         |
| HIST1H3C | histone cluster 1 H3 family member c                                                              |
| SMARCA4  | SWI/SNF related, matrix associated, actin dependent regulator of chromatin, subfamily a, member 4 |
| HIST1H3I | histone cluster 1 H3 family member i                                                              |
| BRCA1    | BRCA1, DNA repair associated                                                                      |
| RNF2     | ring finger protein 2                                                                             |
| CDC5L    | cell division cycle 5 like                                                                        |
| OBSL1    | obscurin like 1                                                                                   |
| YWHAQ    | tyrosine 3-monooxygenase/tryptophan 5-monooxygenase activation protein theta                      |
| IKBKG    | inhibitor of nuclear factor kappa B kinase subunit gamma                                          |
| DDX5     | DEAD-box helicase 5                                                                               |
| TRAF6    | TNF receptor associated factor 6                                                                  |
| DHX9     | DExH-box helicase 9                                                                               |

Table S3. Core targets and corresponding bioactive components.

| Gene Name | Number of Component | Components ID                                                                                                                                                                                                                         |
|-----------|---------------------|---------------------------------------------------------------------------------------------------------------------------------------------------------------------------------------------------------------------------------------|
| HSP90AA1  | 60                  | 1, 2, 3, 4, 5, 6, 7, 8, 9, 10, 11, 12, 13, 14, 15, 16, 17, 18, 19, 20, 21, 22, 23, 24, 25, 26, 27, 28, 29, 30, 31, 32, 33, 34, 35, 36, 37, 38, 39, 40, 41, 42, 43, 44, 45, 46, 47, 48, 49, 50, 51, 52, 53, 54, 55, 56, 57, 58, 59, 60 |
| AR        | 59                  | 1, 2, 3, 4, 5, 6, 7, 8, 9, 10, 11, 12, 13, 14, 15, 16, 17, 18, 19, 20, 21, 22, 23, 24, 25, 26, 27, 28, 29, 30, 31, 32, 33, 34, 35, 36, 37, 38, 39, 40, 41, 42, 43, 44, 45, 47, 48, 49, 50, 51, 52, 53, 54, 55, 56, 57, 58, 59, 60     |
| CDK2      | 59                  | 1, 2, 3, 5, 6, 7, 8, 9, 10, 11, 12, 13, 14, 15, 16, 17, 18, 19, 20, 21, 22, 23, 24, 25, 26, 27, 28, 29, 30, 31, 32, 33, 34, 35, 36, 37, 38, 39, 40, 41, 42, 43, 44, 45, 46, 47, 48, 49, 50, 51, 52, 53, 54, 55, 56, 57, 58, 59, 60    |
| ESR1      | 58                  | 1, 2, 3, 4, 5, 6, 7, 8, 9, 10, 11, 12, 13, 14, 15, 16, 17, 18, 19, 20, 21, 22, 23, 24, 25, 26, 27, 28, 29, 31, 32, 33, 34, 35, 36, 37, 38, 39, 40, 41, 42, 43, 44, 45, 47, 48, 49, 50, 51, 52, 53, 54, 55, 56, 57, 58, 59, 60         |
| EGFR      | 55                  | 1, 2, 4, 5, 6, 7, 8, 9, 10, 11, 12, 13, 14, 15, 16, 17, 18, 19, 20, 21, 22, 23, 24, 25, 26, 27, 28, 29, 30, 31, 33, 34, 35, 36, 37, 38, 39, 40, 42, 43, 44, 45, 48, 49, 50, 51, 52, 53, 54, 55, 56, 57, 58, 59, 60                    |
| HSPA8     | 39                  | 1, 3, 4, 8, 9, 10, 12, 14, 15, 16, 17, 20, 21, 22, 23, 24, 25, 27, 31, 32, 33, 34, 35, 36, 38, 40, 41, 43, 44, 45, 46, 47, 48, 50, 53, 54, 57, 59, 60                                                                                 |
| AKT1      | 35                  | 3, 4, 7, 12, 13, 15, 16, 18, 19, 21, 23, 24, 25, 26, 27, 28, 29, 30, 32, 33, 36, 37, 38, 40, 41, 44, 45, 46, 47,                                                                                                                      |

|          |    |                                                                                       |
|----------|----|---------------------------------------------------------------------------------------|
|          |    | 50, 52, 53, 55, 56, 57, 59                                                            |
| GRB2     | 22 | 7, 8, 10, 14, 15, 17, 18, 19, 20, 21, 22, 24, 27, 35, 38, 39, 42, 48, 50, 54, 59, 60  |
| HSP90AB1 | 22 | 8, 10, 14, 15, 17, 18, 20, 21, 22, 23, 24, 26, 27, 28, 35, 38, 39, 48, 50, 56, 59, 60 |
| MDM2     | 17 | 8, 10, 14, 17, 18, 20, 21, 22, 24, 27, 33, 35, 38, 39, 50, 59, 60                     |
| HSPA1A   | 3  | 36,38,46                                                                              |
| PARP1    | 2  | 4,10                                                                                  |
